# Supplementary material for: Elevated Biomarkers of Inflammation and Vascular Dysfunction Are Associated with Distal Sensory Polyneuropathy in People with HIV
Source: MDPI journal article supplement (doi:10.3390/ijms25084245), 2024-04-11
Supplement: s1 [file s1]

**Table S2.** Association of participant characteristics and plasma biomarker factors with DSP signs and symptoms (n = 132).

|                                       | DSP*              |        | Presence of any DSP Symptoms |        | DNP               |        | Presence of Paresthesia (Tingling) |        | Loss of Sensation  |       |
|---------------------------------------|-------------------|--------|------------------------------|--------|-------------------|--------|------------------------------------|--------|--------------------|-------|
|                                       | OR (95%CI)        | p      | OR (95%CI)                   | p      | OR (95%CI)        | p      | OR (95%CI)                         | p      | OR (95%CI)         |       |
| Univariable regression model          |                   |        |                              |        |                   |        |                                    |        |                    |       |
| age                                   | 1.11 (1.05-1.17)  | <0.001 | 1.04 (1.01-1.07)             | 0.02   | 1.04 (1.00-1.08)  | 0.05   | 1.03 (0.99-1.06)                   | 0.08   | 1.01 (0.97-1.04)   | 0.80  |
| Gender (male)                         | 0.27 (0.06-1.27)  | 0.1    | 0.56 (0.23-1.37)             | 0.20   | 0.42 (0.11-1.56)  | 0.20   | 0.41 (0.14-1.17)                   | 0.09   | 0.38 (0.11-1.42)   | 0.15  |
| Ethnicity (Hispanic)                  | 1.23 (0.19-8.00)  | 0.83   | 0.34 (0.07-1.74)             | 0.20   | 0.58 (0.06-5.99)  | 0.65   | 0.56 (0.10-3.07)                   | 0.51   | 0.70 (0.12-3.94)   | 0.68  |
| Height                                | 1.12 (0.98-1.29)  | 0.09   | 1.05 (0.95-1.15)             | 0.35   | 1.05 (0.93-1.18)  | 0.46   | 1.13 (1.01-1.27)                   | 0.03   | 1.08 (0.96-1.22)   | 0.22  |
| Diabetes Mellitus                     | 0.75 (0.08-6.75)  | 0.81   | 2.37 (0.50-11.21)            | 0.27   | 3.17 (0.56-17.91) | 0.19   | 2.37 (0.50-11.21)                  | 0.55   | <0.001 (<0.001- )  | 0.99  |
| Metabolic Syndrome                    | 0.61 (0.21-1.82)  | 0.38   | 2.76 (1.23-6.19)             | 0.01   | 2.53 (0.88-7.33)  | 0.08   | 2.03 (0.85-4.84)                   | 0.11   | 1.67 (0.60-4.65)   | 0.33  |
| Framingham CVD risk score             | 1.08 (1.03-1.13)  | <0.001 | 1.06 (1.02-1.10)             | 0.003  | 1.07 (1.03-1.12)  | 0.002  | 1.05 (1.01-1.09)                   | 0.02   | 1.03 (0.98-1.07)   | 0.25  |
| Lifetime alcohol use disorder         | 1.29 (0.42-3.95)  | 0.66   | 1.28 (0.57-2.88)             | 0.54   | 1.24 (0.43-3.56)  | 0.69   | 1.88 (0.76-4.66)                   | 0.17   | 1.87 (0.65-5.41)   | 0.25  |
| Lifetime methamphetamine use disorder | 1.70 (0.33-8.69)  | 0.52   | 0.81 (0.36-1.82)             | 0.61   | 1.49 (0.51-4.28)  | 0.46   | 0.68 (0.28-1.65)                   | 0.39   | 0.97 (0.35-2.71)   | 0.96  |
| Lifetime opioid use disorder          | <0.001 (<0.001-)  | 0.99   | 0.63 (0.13-3.08)             | 0.57   | 0.67 (0.08-5.59)  | 0.71   | 0.89 (0.18-4.40)                   | 0.88   | 0.62 (0.07-5.17)   | 0.66  |
| HIV seropositivity                    | 3.32 (1.00-11.03) | 0.049  | 4.81 (1.97-11.73)            | <0.001 | 1.07 (1.03-1.12)  | 0.01   | 6.15 (2.15-17.57)                  | <0.001 | 10.10 (2.21-46.23) | 0.003 |
| Factor 1                              | 1.66 (0.90-3.09)  | 0.10   | 1.59 (1.01-2.53)             | 0.05   | 1.77 (0.96-3.24)  | 0.06   | 1.52 (0.92-2.50)                   | 0.1    | 1.16 (0.65-)       | 0.62  |
| Factor 2                              | 2.01 (1.05-3.64)  | 0.02   | 2.03 (1.26-3.25)             | 0.003  | 1.82 (1.03-3.23)  | 0.04   | 2.15 (1.29-3.57)                   | 0.003  | 2.54 (1.39-4.63)   | 0.002 |
| Factor 3                              | 1.70 (0.91-3.19)  | 0.10   | 1.41 (0.89-2.23)             | 0.14   | 1.53 (0.83-2.80)  | 0.17   | 1.22 (0.75-2.01)                   | 0.41   | 1.15 (0.64-2.06)   | 0.64  |
| Factor 4                              | 3.56 (1.24-10.26) | 0.02   | 1.05 (0.68-1.60)             | 0.84   | 0.99 (0.57-1.71)  | 0.99   | 1.20 (0.72-1.99)                   | 0.49   | 0.98 (0.58-1.67)   | 0.95  |
| Factor 5                              | 1.08 (0.55-2.11)  | 0.82   | 0.95 (0.58-1.54)             | 0.83   | 1.01 (0.53-1.93)  | 0.97   | 1.01 (0.65-1.88)                   | 0.72   | 0.83 (0.45-1.52)   | 0.54  |
| Factor 6                              | 1.13 (0.56-2.23)  | 0.73   | 1.07 (0.65-1.76)             | 0.78   | 1.40 (0.69-2.83)  | 0.35   | 1.21 (0.69-2.11)                   | 0.50   | 1.32 (0.67-2.60)   | 0.42  |
| Multivariable analysis**              |                   |        |                              |        |                   |        |                                    |        |                    |       |
| Age                                   | 1.14 (1.06-1.23)  | <0.001 | 1.04 (1.00-1.08)             | 0.04   | 1.01 (0.95-1.07)  | 0.71   | 1.02 (0.97-1.07)                   | 0.44   | -                  | -     |
| Gender (male)                         | -                 | -      | -                            | -      | -                 | -      | 2.89 (0.55-15.25)                  | 0.21   | -                  | -     |
| Height                                | 1.24 (0.93-1.64)  | 0.14   | -                            | -      | -                 | -      | 1.07 (0.94-1.22)                   | 0.31   | -                  | -     |
| Framingham CVD risk score             | 1.07 (0.98-1.16)  | 0.10   | 1.02 (0.97-1.08)             | 0.42   | 1.08 (1.03-1.13)  | <0.001 | 1.05 (1.01-1.10)                   | 0.02   | -                  | -     |
| Metabolic Syndrome                    | -                 | -      | 2.90 (1.11-7.54)             | 0.03   | 1.41 (0.38-5.22)  | 0.61   | -                                  | -      | -                  | -     |
| HIV seropositivity                    | 6.40 (1.30-31.45) | 0.02   | 5.73 (2.02-16.23)            | 0.001  | 7.51 (1.73-32.71) | 0.007  | 5.24 (1.68-16.38)                  | 0.004  | 7.09 (1.50-33.59)  | 0.01  |
| Factor 1                              | 1.23 (0.41-3.78)  | 0.71   | 0.99 (0.55-1.78)             | 0.97   | 1.04 (0.48-2.25)  | 0.92   | 1.00 (0.53-1.90)                   | 0.99   | -                  | -     |
| Factor 2 (VCAM, sTNFRII)              | 1.98 (0.90-4.35)  | 0.09   | 1.61 (0.95-2.74)             | 0.09   | 1.33 (0.65-2.69)  | 0.43   | 1.66 (0.95-2.90)                   | 0.08   | 2.08 (1.08-3.99)   | 0.03  |
| Factor 3 (uPAR, d-dimer, IL-6)        | 0.98 (0.32-2.70)  | 0.97   | -                            | -      | -                 | -      | -                                  | -      | -                  | -     |
| Factor 4 (MMP-2)                      | 5.13 (1.21-21.82) | 0.03   | -                            | -      | -                 | -      | -                                  | -      | -                  | -     |

\* DSP was defined as the presence of two or more DSP signs: reduced, bilateral, symmetric, distal vibration, sharp sensation, and ankle reflexes. DNP: distal neuropathic pain; DSP: distal sensory polyneuropathy; METH: methamphetamine
