# Supplementary material for: Elevated Biomarkers of Inflammation and Vascular Dysfunction Are Associated with Distal Sensory Polyneuropathy in People with HIV
Source: MDPI journal article supplement (doi:10.3390/ijms25084245), 2024-04-11
Supplement: s1 [file s1]

**Table S3.** Association of demographic characteristics and plasma biomarker with DSP signs and symptoms in PWH (n = 68).

|                                          | DSP*              |        | Presence of any DSP Symptoms |      | DNP               |      | Presence of Paresthesia (Tingling) |      | Loss of Sensation |      |
|------------------------------------------|-------------------|--------|------------------------------|------|-------------------|------|------------------------------------|------|-------------------|------|
|                                          | OR (95%CI)        | p      | OR (95%CI)                   | p    | OR (95%CI)        | p    | OR (95%CI)                         | p    | OR (95%CI)        | p    |
| Univariable regression model             |                   |        |                              |      |                   |      |                                    |      |                   |      |
| Age (year)                               | 1.15 (1.06-1.26)  | <0.001 | 1.04 (0.99-1.09)             | 0.06 | 1.03 (0.98-1.09)  | 0.17 | 1.03 (0.99-1.08)                   | 0.10 | 1.01 (0.96-1.05)  | 0.73 |
| Gender (male)                            | 0.96 (0.10-9.13)  | 0.97   | 0.76 (0.13-4.50)             | 0.76 | 0.77 (0.09-7.19)  | 0.82 | 1.03 (0.17-6.11)                   | 0.98 | 0.63 (0.07-5.84)  | 0.68 |
| Ethnicity (Hispanic)                     | 1.58 (0.12-20.7)  | 0.73   | 0.42 (0.04-4.24)             | 0.46 | 1.00 (0.08-11.5)  | 0.99 | 0.71 (0.07-7.66)                   | 0.77 | 0.71 (0.06-7.66)  | 0.77 |
| Height                                   | 1.04 (0.86-1.24)  | 0.69   | 1.05 (0.91-1.21)             | 0.50 | 1.03 (0.87-1.22)  | 0.74 | 1.11 (0.95-1.30)                   | 0.18 | 1.07 (0.91-1.26)  | 0.44 |
| Diabetes Mellitus                        | 5.20 (0.30-90.2)  | 0.26   | <0.001 (<0.001- )            | 0.99 | <0.001 (<0.001- ) | 0.99 | <0.001 (<0.001- )                  | 0.99 | <0.001 (<0.001)   | 0.99 |
| Metabolic Syndrome                       | 1.92 (0.51-7.24)  | 0.33   | 3.08 (1.04-9.08)             | 0.04 | 2.06 (0.59-7.15)  | 0.25 | 2.64 (0.88-7.92)                   | 0.08 | 1.51 (0.46-5.01)  | 0.50 |
| Framingham CVD risk score                | 1.13 (1.05-1.22)  | 0.001  | 1.06 (1.01-1.13)             | 0.03 | 1.07 (1.01-1.14)  | 0.03 | 1.05 (0.99-1.11)                   | 0.09 | 1.03 (0.97-1.09)  | 0.29 |
| Duration of ART                          | 1.00 (0.99-1.01)  | 0.53   | 1.01 (0.99-1.01)             | 0.17 | 1.01 (0.99-1.01)  | 0.21 | 1.00 (0.99-1.01)                   | 0.45 | 1.01 (0.99-1.01)  | 0.51 |
| Prior exposure to the D-drugs            | 3.70 (0.54-25.38) | 0.18   | 2.52 (0.39-16.29)            | 0.33 | 0.98 (0.10-9.58)  | 0.98 | 3.42 (0.52-22.23)                  | 0.20 | 5.87 (0.88-39.20) | 0.07 |
| Duration of infection                    | 1.10 (1.02-1.19)  | 0.01   | 1.05 (0.99-1.11)             | 0.12 | 1.05 (0.98-1.13)  | 0.14 | 1.05 (0.99-1.11)                   | 0.13 | 1.05 (0.98-1.12)  | 0.14 |
| Plasma viral load                        | 1.17 (0.53-2.57)  | 0.70   | 0.83 (0.42-1.65)             | 0.60 | 1.03 (0.47-2.25)  | 0.94 | 0.56 (0.23-1.35)                   | 0.20 | 0.49 (0.16-1.45)  | 0.20 |
| Current CD4 T-cells count                | 1.00 (0.99-1.00)  | 0.75   | 0.99 (0.99-1.00)             | 0.35 | 1.00 (0.99-1.00)  | 0.74 | 1.00 (0.99-1.00)                   | 0.72 | 1.00 (1.00-1.00)  | 0.09 |
| Lifetime alcohol use disorder            | 1.63 (0.38-7.05)  | 0.51   | 1.14 (0.40-3.27)             | 0.81 | 1.05 (0.30-3.69)  | 0.94 | 1.82 (0.58-5.70)                   | 0.30 | 1.41 (0.41-4.78)  | 0.58 |
| Lifetime methamphetamine use disorder    | 0.33 (0.08-1.34)  | 0.12   | 0.42 (0.15-1.23)             | 0.11 | 0.96 (0.27-3.39)  | 0.95 | 0.24 (0.08-0.76)                   | 0.02 | 0.61 (0.19-1.99)  | 0.41 |
| Lifetime opioid use disorder             | <0.001 (<0.001-)  | 0.99   | 0.49 (0.05-5.03)             | 0.55 | 1.25 (0.12-13.12) | 0.85 | 0.66 (0.07-6.85)                   | 0.73 | 1.02 (0.10-10.7)  | 0.98 |
| Factor 1                                 | 1.52 (0.70-3.31)  | 0.29   | 1.48 (0.80-2.73)             | 0.21 | 1.43 (0.69-2.97)  | 0.33 | 1.23 (0.67-2.28)                   | 0.51 | 0.90 (0.46-1.76)  | 0.76 |
| Factor 2                                 | 3.12 (1.27-7.70)  | 0.01   | 1.58 (0.84-2.96)             | 0.16 | 1.42 (0.68-2.95)  | 0.35 | 1.46 (0.77-2.77)                   | 0.25 | 2.30 (1.07-4.94)  | 0.03 |
| Factor 3                                 | 2.25 (1.02-4.98)  | 0.04   | 1.47 (0.81-2.70)             | 0.21 | 1.57 (0.77-3.20)  | 0.22 | 1.43 (0.77-2.65)                   | 0.26 | 1.21 (0.61-2.37)  | 0.58 |
| Factor 4                                 | 2.40 (0.77-7.49)  | 0.13   | 1.07 (0.60-1.90)             | 0.83 | 0.92 (0.47-1.79)  | 0.81 | 1.12 (0.61-2.07)                   | 0.71 | 1.10 (0.55-2.17)  | 0.78 |
| Factor 5                                 | 1.19 (0.56-2.51)  | 0.65   | 1.36 (0.76-2.43)             | 0.30 | 1.41 (0.68-2.93)  | 0.35 | 1.33 (0.73-2.44)                   | 0.35 | 1.03 (0.54-1.97)  | 0.92 |
| Factor 6                                 | 0.83 (0.39-1.78)  | 0.64   | 0.90 (0.47-1.67)             | 0.74 | 1.25 (0.55-2.81)  | 0.59 | 1.01 (0.53-1.93)                   | 0.97 | 1.66 (0.71-3.89)  | 0.24 |
| Multivariable logistic regression model* |                   |        |                              |      |                   |      |                                    |      |                   |      |
| Age                                      | 1.18 (1.07-1.30)  | <0.001 | 1.02 (0.96-1.09)             | 0.57 | -                 | -    | 1.01 (0.95-1.08)                   | 0.76 | -                 | -    |
| Lifetime methamphetamine use disorder    | -                 | -      | -                            | -    | -                 | -    | 3.82 (1.23-11.87)                  | 0.02 | -                 | -    |
| Framingham CVD risk score                | 0.97 (0.85-1.10)  | 0.61   | 1.07 (1.01-1.13)             | 0.03 | 1.07 (1.01-1.14)  | 0.03 | 1.02 (0.92-1.12)                   | 0.76 | -                 | -    |
| Metabolic Syndrome                       | -                 | -      | 1.85 (0.54-6.35)             | 0.33 | -                 | -    | 1.58 (0.42-5.95)                   | 0.50 | -                 | -    |
| Duration of infection                    | 1.05 (0.95-1.17)  | 0.35   | -                            | -    | -                 | -    | -                                  | -    | -                 | -    |
| Prior exposure to the D-drugs            | -                 | -      | -                            | -    | -                 | -    | -                                  | -    | 9.43 (1.23-72.10) | 0.03 |
| Current CD4 T-cells count                | -                 | -      | -                            | -    | -                 | -    | -                                  | -    | 0.99 (0.99-1.00)  | 0.08 |

|                                       |                  |      |   |   |   |   |   |   |                  |      |
|---------------------------------------|------------------|------|---|---|---|---|---|---|------------------|------|
| <b>Factor 1</b>                       | -                | -    | - | - | - | - | - | - | -                | -    |
| <b>Factor 2</b> (VCAM, sTNFRII)       | 5.45 (1.42-21.0) | 0.01 | - | - | - | - | - | - | 2.30 (1.08-4.91) | 0.03 |
| <b>Factor 3</b> (uPAR, d-dimer, IL-6) | 0.54 (0.16-1.85) | 0.33 | - | - | - | - | - | - | -                | -    |
| <b>Factor 4</b> (MMP-2)               | -                | -    | - | - | - | - | - | - | -                | -    |

\* DSP was defined as the presence of two or more of the following DSP signs: reduced, bilateral, symmetric, distal vibration, sharp sensation, and ankle reflexes.  
DNP: distal neuropathic pain.
