# Supplementary material for: Elevated Biomarkers of Inflammation and Vascular Dysfunction Are Associated with Distal Sensory Polyneuropathy in People with HIV
Source: MDPI journal article supplement (doi:10.3390/ijms25084245), 2024-04-11
Supplement: s1 [file s1]

**Table S1.** Pearson correlation coefficient of inflammatory and vascular integrity biomarkers.

| Biomarkers | MCP-1       | TIMP-1      | IP-10       | IL-8        | VEGF        | VCAM        | sTNFRII     | uPAR        | d-dimer     | IL-6        | MMP-2       | TIMP-2 | MMP-7       |
|------------|-------------|-------------|-------------|-------------|-------------|-------------|-------------|-------------|-------------|-------------|-------------|--------|-------------|
| MCP-1      | 1           |             |             |             |             |             |             |             |             |             |             |        |             |
| TIMP-1     | <b>0.52</b> | 1           |             |             |             |             |             |             |             |             |             |        |             |
| IP-10      | <b>0.48</b> | <b>0.42</b> | 1           |             |             |             |             |             |             |             |             |        |             |
| IL-8       | <b>0.45</b> | <b>0.42</b> | <b>0.35</b> | 1           |             |             |             |             |             |             |             |        |             |
| VEGF       | <b>0.42</b> | <b>0.44</b> | <b>0.18</b> | <b>0.39</b> | 1           |             |             |             |             |             |             |        |             |
| VCAM-1     | 0.06        | <b>0.23</b> | <b>0.32</b> | 0.07        | 0.07        | 1           |             |             |             |             |             |        |             |
| sTNFRII    | <b>0.24</b> | <b>0.49</b> | <b>0.33</b> | <b>0.20</b> | <b>0.24</b> | <b>0.60</b> | 1           |             |             |             |             |        |             |
| uPAR       | 0.20        | <b>0.39</b> | <b>0.30</b> | 0.13        | 0.11        | <b>0.30</b> | <b>0.53</b> | 1           |             |             |             |        |             |
| d-dimer    | <b>0.19</b> | <b>0.29</b> | 0.06        | <b>0.19</b> | <b>0.19</b> | 0.05        | <b>0.32</b> | <b>0.50</b> | 1           |             |             |        |             |
| IL-6       | <b>0.31</b> | <b>0.33</b> | <b>0.31</b> | <b>0.27</b> | 0.14        | 0.04        | <b>0.37</b> | <b>0.50</b> | <b>0.44</b> | 1           |             |        |             |
| MMP-2      | <b>0.26</b> | <b>0.15</b> | -0.04       | 0.15        | -0.05       | 0.06        | 0.16        | 0.09        | 0.16        | 0.10        | 1           |        |             |
| TIMP-2     | 0.12        | <b>0.45</b> | -0.09       | 0.14        | 0.14        | <b>0.23</b> | <b>0.30</b> | 0.16        | <b>0.20</b> | 0.06        | <b>0.42</b> | 1      |             |
| MMP-7      | 0.13        | <b>0.18</b> | 0.05        | <b>0.14</b> | <b>0.16</b> | <b>0.27</b> | <b>0.42</b> | 0.13        | 0.14        | <b>0.26</b> | <b>0.21</b> | 0.11   | 1           |
| ICAM-1     | 0.13        | <b>0.18</b> | <b>0.22</b> | 0.11        | 0.08        | <b>0.27</b> | <b>0.35</b> | 0.15        | <b>0.20</b> | <b>0.22</b> | 0.09        | 0.12   | <b>0.26</b> |

\* Bold values denote significant correlation at a  $p$ -value < 0.05.
