# Supplementary material for: Elevated Biomarkers of Inflammation and Vascular Dysfunction Are Associated with Distal Sensory Polyneuropathy in People with HIV
Source: MDPI journal article supplement (doi:10.3390/ijms25084245), 2024-04-11
Supplement: s1 [file s1]

**Table S4.** Association of demographic characteristics and plasma biomarker with DSP signs and symptoms in PWoH (n = 64).

|                                       | DSP*              |      | Presence of any DSP Symptoms |       | DNP              |      | Presence of Pares-<br>thesia (Tingling) |       | Loss of Sensation |    |
|---------------------------------------|-------------------|------|------------------------------|-------|------------------|------|-----------------------------------------|-------|-------------------|----|
|                                       | OR (95%CI)        | p    | OR (95%CI)                   | p     | OR (95%CI)       | p    | OR (95%CI)                              | p     | OR (95%CI)        | p  |
| <b>Univariable analysis</b>           |                   |      |                              |       |                  |      |                                         |       |                   |    |
| age (year)                            | 1.11 (1.00-1.24)  | 0.07 | 1.06 (1.00-1.13)             | 0.047 | 1.16 (0.99-1.37) | 0.07 | ns                                      | ns    | ns                | ns |
| Gender (male)                         | ns                | ns   | ns                           | ns    | ns               | ns   | ns                                      | ns    | ns                | ns |
| Ethnicity (Hispanic)                  | ns                | ns   | ns                           | ns    | ns               | ns   | ns                                      | ns    | ns                | ns |
| Height                                | ns                | ns   | ns                           | ns    | ns               | ns   | ns                                      | ns    | ns                | ns |
| Diabetes Mellitus                     | ns                | ns   | 17.4 (2.33-129)              | 0.005 | 41.33 (2.87-594) | 0.01 | 13.33 (1.58-112)                        | 0.02  | ns                | ns |
| Metabolic Syndrome                    | ns                | ns   | 5.57 (1.03-30.1)             | 0.046 | ns               | ns   | ns                                      | ns    | ns                | ns |
| Framingham CVD risk score             | ns                | ns   | 1.06 (1.01-1.13)             | 0.03  | 1.10 (1.02-1.18) | 0.01 | 1.06 (0.99-1.12)                        | 0.06  | ns                | ns |
| Lifetime alcohol use disorder         | ns                | ns   | ns                           | ns    | ns               | ns   | ns                                      | ns    | ns                | ns |
| Lifetime methamphetamine use disorder | ns                | ns   | ns                           | ns    | ns               | ns   | ns                                      | ns    | ns                | ns |
| Lifetime opioid use disorder          | ns                | ns   | ns                           | ns    | ns               | ns   | ns                                      | ns    | ns                | ns |
| Factor 1                              | ns                | ns   | ns                           | ns    | ns               | ns   | ns                                      | ns    | ns                | ns |
| Factor 2                              | ns                | ns   | ns                           | ns    | ns               | ns   | 2.57 (0.96-6.93)                        | 0.06  | ns                | ns |
| Factor 3                              | ns                | ns   | 3.01 (1.08-8.42)             | 0.03  | 4.81 (0.84-27.4) | 0.08 | ns                                      | ns    | ns                | ns |
| Factor 4                              | 15.2 (1.07-215)   | 0.04 | ns                           | ns    | ns               | ns   | ns                                      | ns    | ns                | ns |
| Factor 5                              | ns                | ns   | ns                           | ns    | ns               | ns   | ns                                      | ns    | ns                | ns |
| Factor 6                              | ns                | ns   | ns                           | ns    | ns               | ns   | 3.96 (0.91-14.2)                        | 0.07  | ns                | ns |
| <b>Multivariable analysis*</b>        |                   |      |                              |       |                  |      |                                         |       |                   |    |
| Diabetes mellitus                     |                   |      | 13.2 (1.71-102)              | 0.01  | ns               | ns   | ns                                      | ns    |                   |    |
| Factor 2 (VCAM, sTNFR2)               | -                 | -    | -                            | -     | -                | -    | 3.79 (0.98-14.6)                        | 0.053 | -                 | -  |
| Factor 4 (MMP-2)                      | 49.24 (1.26-1921) | 0.04 | -                            | -     | -                | -    | -                                       | -     | -                 | -  |

\* DSP was defined as the presence of two or more of the following DSP signs: reduced, bilateral, symmetric, distal vibration, sharp sensation, and ankle reflexes. DNP: distal neuropathic pain.
